# Supplementary material for: The inability to disrupt the immunological synapse between infected human T cells and APCs distinguishes HIV-1 from most other primate lentiviruses
Source: JCI journal article supplement (doi:10.1172/jci38994), 2009-09-14
Supplement: sd1 [file 1]

301 Moved Permanently

# Moved Permanently

The document has moved here.
